# Supplementary material for: Incorporating Recalcitrant Dissolved Organic Carbon and Microbial Carbon Pump Processes into the cGENIE Earth System Model (cGENIEv0.9.35-MCP)
Source: Copernicus journal article supplement (doi:10.5194/egusphere-2025-2967), 2025-09-19
Supplement: Supplementary file 1 [file egusphere-2025-2967-supplement.pdf]

*Supporting of*

## **Incorporating Recalcitrant Dissolved Organic Carbon and Microbial Carbon Pump Processes into the cGENIE Earth System Model (cGENIEv0.9.35-MCP)**

Yuxian Lai<sup>1</sup>, Wentao Ma<sup>2\*</sup>, Zihui Zhao<sup>3</sup>, Peng Xiu<sup>1</sup>, Nianzhi Jiao<sup>1\*</sup>

<sup>1</sup>State Key Laboratory of Marine Environmental Science, College of Ocean and Earth Sciences, Fujian Key Laboratory of Marine Carbon Sequestration, Xiamen University, Xiamen, China

<sup>2</sup>State Key Laboratory of Satellite Ocean Environment Dynamics, Second Institute of Oceanography, MNR, Hangzhou, China

<sup>3</sup>Changshan Meteorological Bureau, Quzhou, China

Correspondence to: Wentao Ma ([wtma@sio.org.cn](mailto:wtma@sio.org.cn)), Nianzhi Jiao ([jjiao@xmu.edu.cn](mailto:jjiao@xmu.edu.cn))

**Table S1. Comparison of biogeochemical configuration between cGENIE-MCP and previous cGENIE models**

| Configurations                    | cGENIE-MCP<br>(This study)                                                                              | cGENIE<br>(Crichton et al., 2021)                                                                       |
|-----------------------------------|---------------------------------------------------------------------------------------------------------|---------------------------------------------------------------------------------------------------------|
| CO <sub>2</sub> -climate feedback | YES                                                                                                     | YES                                                                                                     |
|                                   | Dust source:<br>(Mahowald et al., 1999)                                                                 | Dust source:<br>(Mahowald et al., 1999)                                                                 |
| Iron cycle                        | TDFe and TL<br>F <sub>esol</sub> = 0.5<br>K <sub>scav</sub> = 0.1                                       | TDFe and TL<br>F <sub>esol</sub> = 0.5<br>K <sub>scav</sub> = 0.1                                       |
|                                   | E <sub>a</sub> (POC1) =54000                                                                            | E <sub>a</sub> (POC1) =54000                                                                            |
| Temperature-dependent             | E <sub>a</sub> (POC2) =80000<br>E <sub>a</sub> (LDOC)=54000<br>$\beta_{\text{LDOC}}=1.32\times 10^{13}$ | E <sub>a</sub> (POC2) =80000<br>E <sub>a</sub> (LDOC)=54000<br>$\beta_{\text{LDOC}}=1.32\times 10^{13}$ |
| MCP process                       | $\tau_{\text{SL}} = 5$                                                                                  | N/A                                                                                                     |

$$\tau_R = 16000$$

$$a = 0.015$$

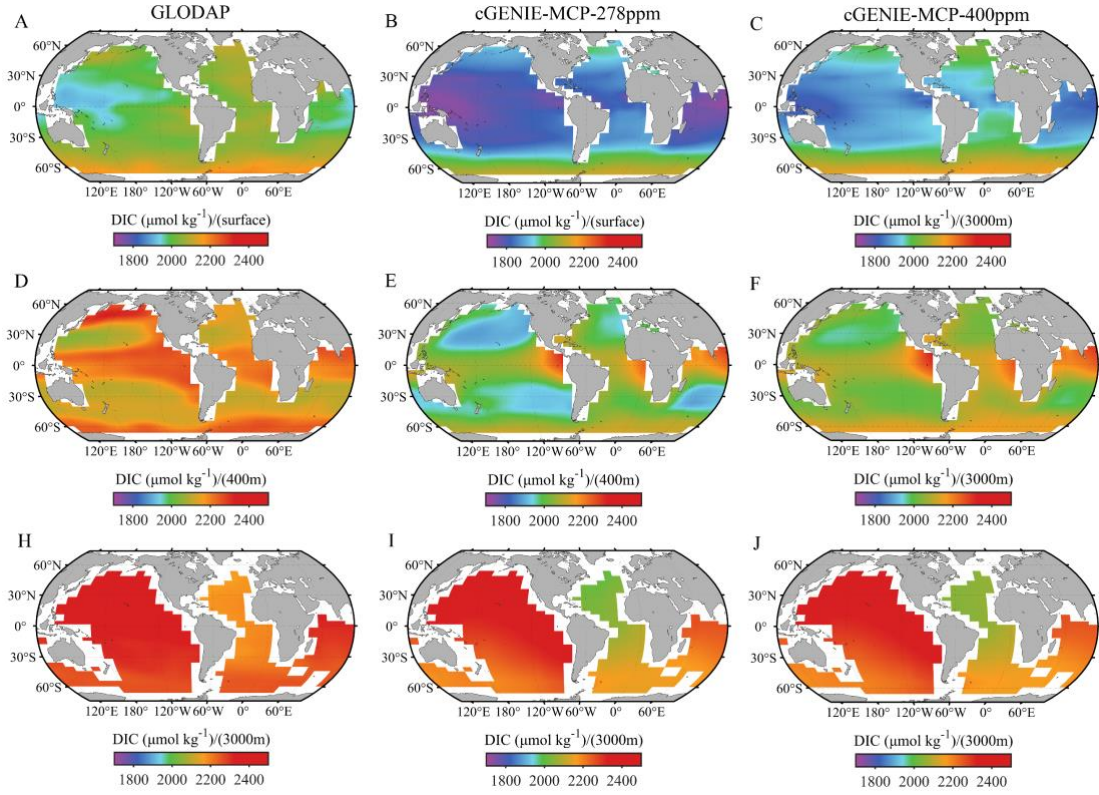

Figure S1. Ocean DIC distributions ( $\mu\text{mol kg}^{-1}$ ) at three depth levels: (A-C) the surface, (D-F) 400 m, and (H-J) 3000 m. Panels show: (A, D, H) observational data from GLODAP; (B, E, I) simulated results from the cGENIE-MCP model at 278 ppm; and (C, F, J) outputs from the cGENIE-MCP model at 400 ppm.

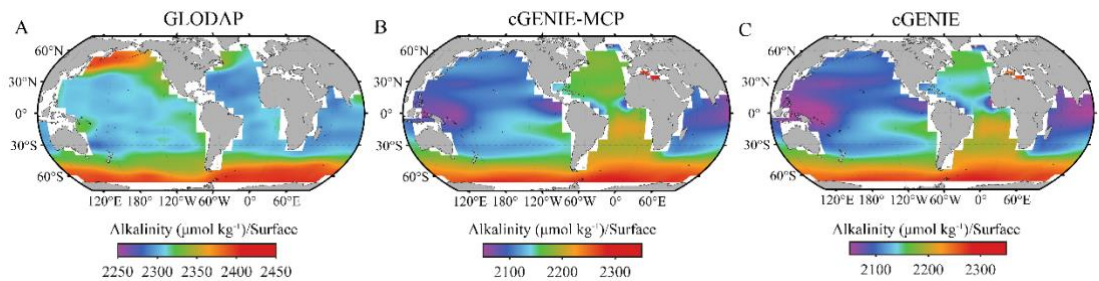

Figure S2. Ocean alkalinity distributions ( $\mu\text{mol kg}^{-1}$ ) at surface: (A) observational data from GLODAP; (B) simulated results from the cGENIE-MCP; and (C) outputs from the cGENIE model.

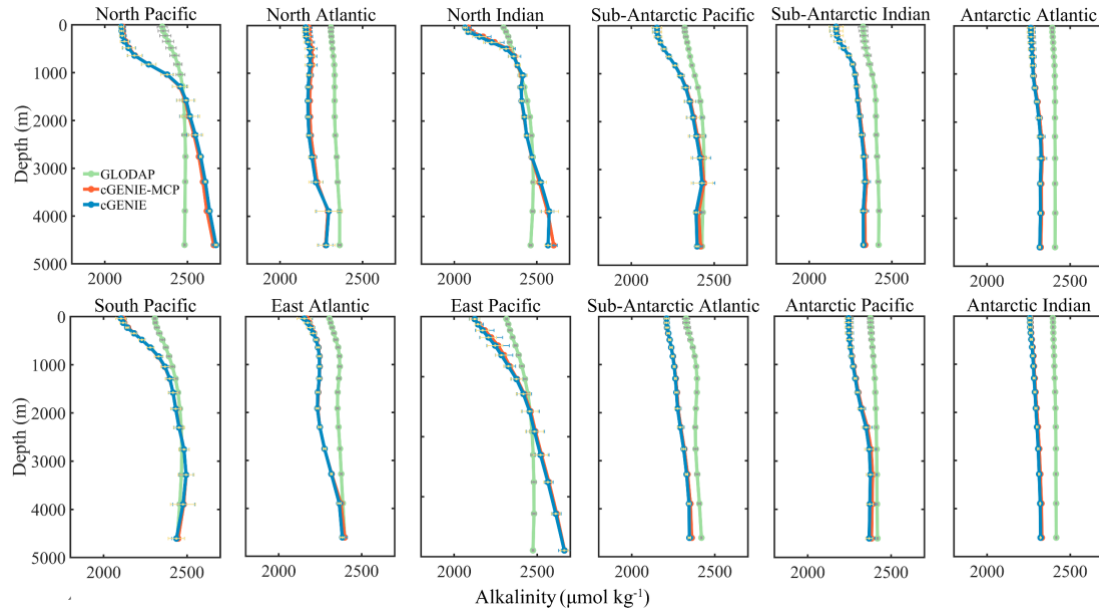

Figure S3. Vertical profiles of alkalinity ( $\mu\text{mol kg}^{-1}$ ) in selected ocean regions, comparing among GLODAP data, cGENIE-MCP and standard cGENIE model outputs. Regions include the Atlantic Ocean, low-latitude tropics, South Pacific, and Northern Indian Ocean, as defined in the model evaluation.

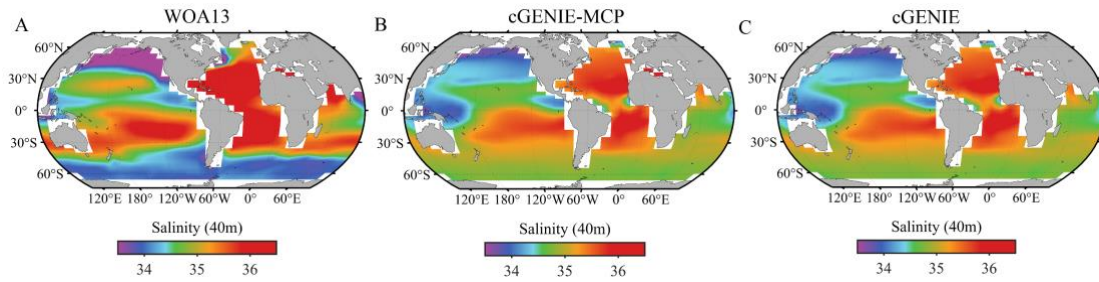

Figure S4. Ocean salinity distributions at surface: (A) observational data from WOA23; (B) simulated results from the cGENIE-MCP; and (C) outputs from the cGENIE model.

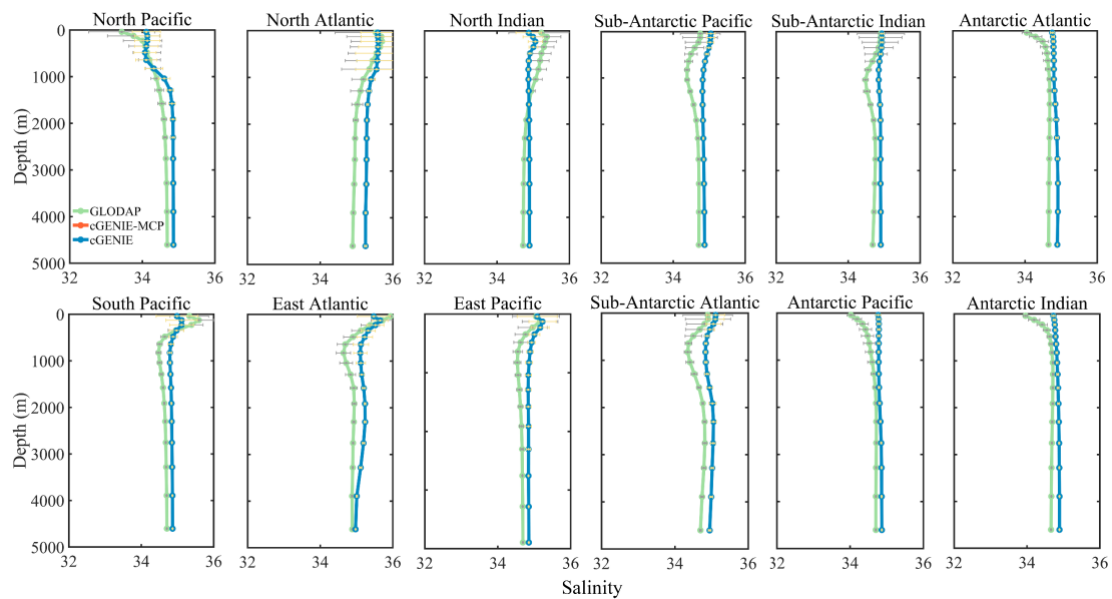

Figure S5. Vertical profiles of salinity in selected ocean regions, comparing among WOA23 data, cGENIE-MCP and standard cGENIE model outputs. Regions include the Atlantic Ocean, low-latitude tropics, South Pacific, and Northern Indian Ocean, as defined in the model evaluation.

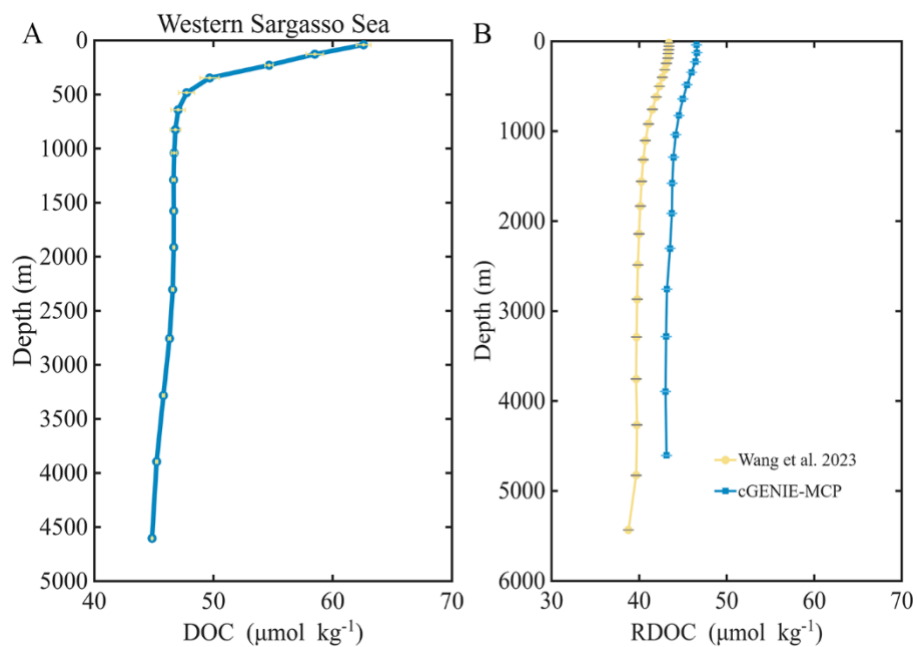

Figure S6. Vertical profiles of DOC and RDOC in selected ocean regions: (A) western Sargasso Sea, (B) the average concentration comparing the results of Wang et al. (2023).

Table S2 The LDOC, SLDOC, and RDOC concentrations from previous studies

| Study Region | Water Layer    | LDOC   | SLDOC  | RDOC               | Reference        |
|--------------|----------------|--------|--------|--------------------|------------------|
| NW Pacific   | Surface <200 m | 20-40% | 15-20% | Deep >1000 m: >90% | Ge et al. (2022) |
| NW Pacific   | Surface <200 m | 5-20%  | 15-30% | Deep >1000 m: >90% | This study       |

Table S3 The LDOC, SLDOC, and RDOC production rate from previous studies

| Study Region         | LDOC                     | SLDOC                     | RDOC                       | Reference              |
|----------------------|--------------------------|---------------------------|----------------------------|------------------------|
| Global euphotic zone | 25 Pg C yr <sup>-1</sup> | 3.7 Pg C yr <sup>-1</sup> | 0.04 Pg C yr <sup>-1</sup> | Legendre et al. (2015) |
| Global euphotic zone | 26 Pg C yr <sup>-1</sup> | 3.9 Pg C yr <sup>-1</sup> | 0.06 Pg C yr <sup>-1</sup> | This study             |

- Crichton, K.A., Wilson, J.D., Ridgwell, A. and Pearson, P.N. 2021. Calibration of temperature-dependent ocean microbial processes in the cGENIE. muffin (v0. 9.13) Earth system model. *Geoscientific Model Development* 14(1), 125-149.
- Ge, T., Luo, C., Ren, P., Zhang, H., Chen, H., Chen, Z., Zhang, J. and Wang, X. 2022. Dissolved organic carbon along a meridional transect in the western north pacific ocean: Distribution, variation and controlling processes. *Frontiers in Marine Science* 9, 909148.
- Legendre, L., Rivkin, R.B., Weinbauer, M.G., Guidi, L. and Uitz, J. 2015. The microbial carbon pump concept: Potential biogeochemical significance in the globally changing ocean. *Progress in Oceanography* 134, 432-450.
- Mahowald, N., Kohfeld, K., Hansson, M., Balkanski, Y., Harrison, S.P., Prentice, I.C., Schulz, M. and Rodhe, H. 1999. Dust sources and deposition during the last glacial maximum and current climate: A comparison of model results with paleodata from ice cores and marine sediments. *Journal of Geophysical Research: Atmospheres* 104(D13), 15895-15916.
- Wang, W.L., Fu, W., Le Moigne, F.A.C., Letscher, R.T., Liu, Y., Tang, J.M. and Primeau, F.W. 2023. Biological carbon pump estimate based on multidecadal hydrographic data. *Nature* 624(7992), 579-585.
